# Supplementary material for: Discovery of superconductivity in technetium borides at moderate pressures
Source: Royal Society of Chemistry journal article supplement (doi:10.1039/d4cp00191e), 2024-01-01
Supplement: d4cp00191e1.pdf [file d4cp00191e1.pdf]

## Discovery of superconductivity in technetium-borides at moderate pressures

Xiangru Tao,<sup>1</sup> Aiqin Yang,<sup>1</sup> Yundi Quan,<sup>1</sup> Biao Wan,<sup>2</sup> Shuxiang Yang,<sup>3</sup> and Peng Zhang<sup>1</sup>

<sup>1</sup>MOE Key Laboratory for Non-equilibrium Synthesis and Modulation of Condensed Matter,  
Shaanxi Province Key Laboratory of Advanced Functional Materials and Mesoscopic Physics,  
School of Physics, Xi'an Jiaotong University, 710049, Xi'an, Shaanxi, P.R.China

<sup>2</sup>Key Laboratory of Material Physics of Ministry of Education,  
School of Physics and Microelectronics, Zhengzhou University, Zhengzhou 450052, Henan, P.R.China

<sup>3</sup>Zhejiang laboratory, Hangzhou, Zhejiang, P.R.China

### I. METHODS

#### A. Particle swarm optimization algorithm

We adopt the particle swarm optimization (PSO) based CALYPSO (Crystal structure AnaLYsis by Particle Swarm Optimization) package [1] in searching for new structures. As a stochastic algorithm, in each iteration of PSO all potential solutions are treated as swarm of particles with certain velocities in the search space of the given problem. The current position and the trajectory of particles in swarm will be stored and broadcast, so as to determine the next moves through the search space. After each iteration, the swarm gradually approach the optimum of the objective function, which is the total-energy in case of structure searches. Both global and local PSO algorithms have been implemented in CALYPSO package, which enables the advantages of efficient convergence and capability in dealing with complex systems.

#### B. Structure search

The searches for compounds of  $Tc_xB_y$  stoichiometry were done at 0, 90 and 180 GPa. In each generation, 60% derived structures of the lowest formation enthalpy are preserved for the next iteration, and 40% new structures are randomly generated. At each pressure above 6700 structures have been generated and totally more than 25000 structures have been derived. The projector augmented-wave [2, 3] density functional theory (PAW-DFT) as implemented in Vienna Ab-initio Simulation Package (VASP) [4–6] and the Perdew-Burke-Ernzerhof generalized gradient approximation (GGA-PBE) [7] exchange-correlation functional are used. Valence electron configurations in PAW potential is Tc-4p<sup>6</sup>4d<sup>5</sup>5s<sup>2</sup> and B-2s<sup>2</sup>2p<sup>1</sup>. Plane-wave energy cutoff of 350 eV,  $\Gamma$ -centered k-point meshes with a resolution of  $2\pi \times 0.05 \text{ \AA}^{-1}$  for Brillouin zone sampling, energy and force convergence criteria of  $1 \times e^{-9}$  eV and 0.03 eV/Å respectively, are adopted for total energy calculations and structure relaxations. In derivation of composition-pressure phase diagram, we use higher precision with plane-wave energy cutoff of 500 eV,  $\Gamma$ -centered k-point meshes resolution of  $2\pi \times 0.03 \text{ \AA}^{-1}$ , energy and force convergence criteria of  $1 \times e^{-9}$  eV and 0.01 eV/Å.

#### C. Electron-phonon calculations

The electronic structures and the phonon properties are calculated using QUANTUM-ESPRESSO (QE) package [8]. The plane-wave kinetic-energy cutoff and the charge density energy cutoff are 100 Ry and 400 Ry, respectively. Optimized norm-conserving pseudopotential with valence electron configurations of Tc-4p<sup>6</sup>4d<sup>5</sup>5s<sup>2</sup> and B-2s<sup>2</sup>2p<sup>1</sup> and Methfessel-Paxton smearing [9] width of 0.02 Ry are used. The setup of k-grids and q-grids in electron-phonon calculations is presented in Table I. The dynamic matrix and the electron-phonon coupling (EPC) constant  $\lambda$  are calculated using the density-functional perturbation theory [10]. Superconducting transition temperature is estimated following the Allen-Dynes modified McMillan equation [11],

$$T_c = \frac{\omega_{\log}}{1.2} \exp \left[ -\frac{1.04(1 + \lambda)}{\lambda - \mu^* (1 + 0.62\lambda)} \right], \quad (1)$$

in which  $\lambda$  is the average EPC parameter,  $\omega_{\log}$  is the logarithmic average frequency, and the Coulomb pseudopotential [12]  $\mu^* = 0.12$ . The dependence of superconducting transition temperatures  $T_c$  of five thermodynamically metastable technetium-borides on Coulomb pseudopotential  $\mu^*$  is presented in Fig. 1.

TABLE I: Setting of k-points and q-points in calculations of superconducting temperatures by Quantum Espresso.

| Formula           | Space group          | P (GPa) | Kmesh1   | Kmesh2   | Qmesh |
|-------------------|----------------------|---------|----------|----------|-------|
| TcB <sub>2</sub>  | P6/mmm               | 20      | 60×60×60 | 15×15×15 | 5×5×5 |
| TcB               | P6 <sub>3</sub> /mmc | 0       | 96×96×48 | 16×16×8  | 8×8×4 |
| Tc <sub>2</sub> B | I4/mcm               | 0       | 45×45×45 | 9×9×9    | 3×3×3 |
| Tc <sub>3</sub> B | P4/mmm               | 0       | 60×60×36 | 15×15×9  | 5×5×3 |
| TcB               | Cmcm                 | 30      | 27×9×27  | 9×3×9    | 3×1×3 |

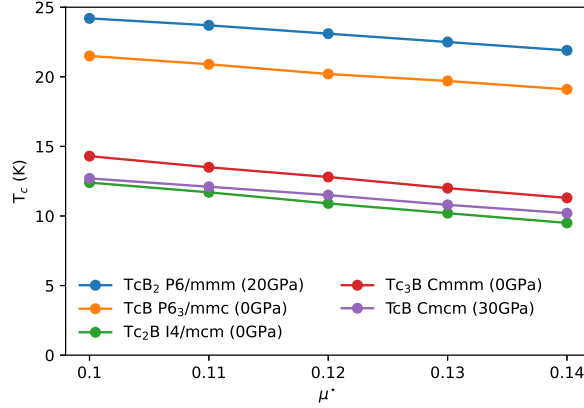FIG. 1: The superconducting transition temperatures  $T_c$  of five thermodynamically metastable technetium-borides as a function of the Coulomb pseudopotential  $\mu^*$ .

## II. ELASTIC CONSTANT

TABLE II: The calculated elastic constants  $C_{ij}$  (GPa), bulk modulus B (GPa), shear modulus S (GPa), Young's modulus Y (GPa), Poisson's ratio  $\nu$ , and Vickers hardness  $H_v$  of superconducting technetium-borides at their lowest dynamically stable pressures.

| Formula                  | Space Group          | B     | Y     | S     | $H_{v,chen}$ | $H_{v,Tian}$ | $C_{11}$ | $C_{12}$ | $C_{13}$ | $C_{21}$ | $C_{22}$ | $C_{23}$ | $C_{31}$ | $C_{32}$ | $C_{33}$ | $C_{44}$ | $C_{55}$ | $C_{66}$ |
|--------------------------|----------------------|-------|-------|-------|--------------|--------------|----------|----------|----------|----------|----------|----------|----------|----------|----------|----------|----------|----------|
| TcB <sub>2</sub> (20GPa) | P6/mmm               | 362.0 | 399.8 | 151.9 | 10.6         | 12.0         | 685      | 213      | 220      | 213      | 685      | 220      | 220      | 220      | 589      | 85       | 85       | 236      |
| TcB (0GPa)               | P6 <sub>3</sub> /mmc | 292.6 | 222.0 | 80.8  | 2.8          | 4.8          | 394      | 231      | 230      | 231      | 394      | 230      | 230      | 230      | 475      | 69       | 69       | 82       |
| Tc <sub>2</sub> B (0GPa) | I4/mmm               | 318.8 | 381.1 | 146.5 | 11.8         | 13.0         | 547      | 171      | 227      | 171      | 547      | 227      | 227      | 227      | 526      | 123      | 123      | 164      |
| Tc <sub>3</sub> B (0GPa) | P4/mmm               | 311.7 | 351.1 | 133.8 | 10.0         | 11.3         | 449      | 229      | 241      | 229      | 449      | 241      | 241      | 241      | 490      | 128      | 128      | 202      |
| TcB (30GPa)              | Cmcm                 | 407.9 | 459.9 | 175.3 | 12.2         | 13.7         | 637      | 321      | 294      | 321      | 498      | 342      | 294      | 342      | 641      | 170      | 292      | 193      |

According to Mouhat's work[13], all five superconductors are mechanically stable. For Tetragonal I structures, I4/mmm-Tc<sub>2</sub>B and P4/mmm-Tc<sub>3</sub>B, following criteria are satisfied: (i)  $C_{11} > |C_{12}|$ . (ii)  $2C_{13}^2 < C_{33}(C_{11} + C_{12})$ . (iii)  $C_{44} > 0$ . (iv)  $C_{66} > 0$ .

For Orthorhombic crystal Cmcm-TcB, Elastic stability criteria are: (i)  $C_{11} > > 0$ . (ii)  $C_{11} \times C_{22} > C_{12}^2$ . (iii)  $C_{11} \times C_{22} \times C_{33} + 2C_{12} \times C_{13} \times C_{23} - C_{11} \times C_{23}^2 - C_{22} \times C_{13}^2 - C_{33} \times C_{12}^2 > 0$ . (iv)  $2C_{13}^2 < C_{33}(C_{11} + C_{12})$ . (vi)  $C_{44} > 0$ . (vii)  $C_{55} > 0$ . (viii)  $C_{66} > 0$ .

For Hexagonal crystal P6/mmm-TcB<sub>2</sub> and P6<sub>3</sub>/mmc-TcB, Elastic stability criteria are: (i)  $C_{11} > |C_{12}|$ . (ii)  $2C_{13}^2 < C_{33}(C_{11} + C_{12})$ . (iii)  $C_{44} > 0$ .

### III. BAND STRUCTURE, PARTIAL DENSITY OF STATES AND FERMI SURFACE

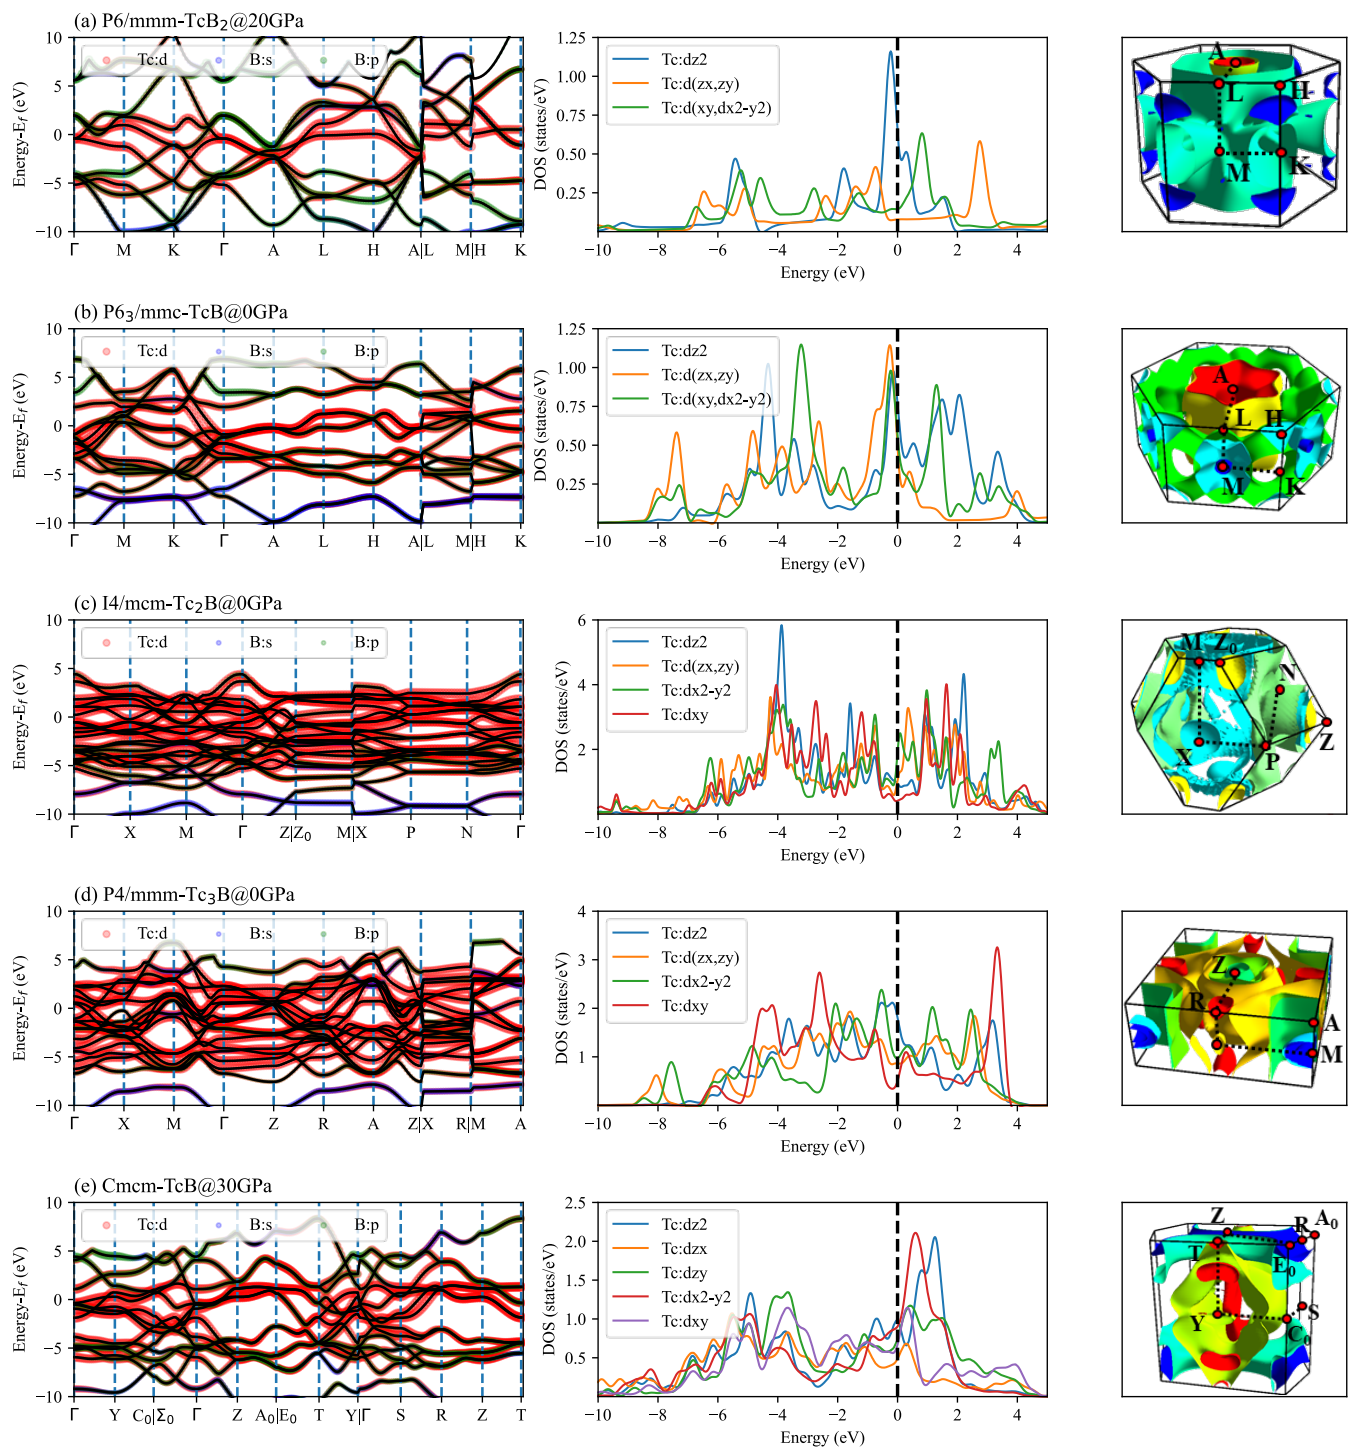

FIG. 2: The fatband, the Tc-4d partial density of states, and the Fermi surfaces of superconducting technetium-borides at their lowest dynamically stable pressures.

## IV. CRYSTAL STRUCTURES AND XRD

TABLE III: Crystal structure information of superconducting technetium-borides at their minimum dynamically stable pressures.

| Formula           | Space Group          | P (GPa) | Lattice                                                        | Atom | Wyckoff Site | x        | y        | z        |
|-------------------|----------------------|---------|----------------------------------------------------------------|------|--------------|----------|----------|----------|
| Tc <sub>2</sub> B | I4/mcm               | 0       | a,b=5.45112, c=4.58875<br>$\alpha,\beta,\gamma=90.00$          | Tc   | 8h           | 0.165870 | 0.334130 | 0.500000 |
|                   |                      |         |                                                                | B    | 4a           | 0.000000 | 0.000000 | 0.250000 |
| Tc <sub>3</sub> B | P4/mmm               | 0       | a,b=2.73625, c=6.53966<br>$\alpha,\beta,\gamma=90.00$          | Tc   | 2h           | 0.500000 | 0.500000 | 0.299594 |
|                   |                      |         |                                                                | Tc   | 1a           | 0.000000 | 0.000000 | 0.000000 |
|                   |                      |         |                                                                | B    | 1b           | 0.000000 | 0.000000 | 0.500000 |
| TcB <sub>2</sub>  | P6/mmm               | 20      | a,b=2.90764, c=3.33220<br>$\alpha,\beta=90.00, \gamma=120.00$  | Tc   | 1a           | 0.000000 | 0.000000 | 0.000000 |
|                   |                      |         |                                                                | B    | 2d           | 0.333333 | 0.666667 | 0.500000 |
| TcB               | P6 <sub>3</sub> /mmc | 0       | a,b=2.98762, c=5.39824<br>$\alpha,\beta=90.00, \gamma=120.00$  | Tc   | 2d           | 0.333333 | 0.666667 | 0.750000 |
|                   | Cmcm                 | 30      | a=2.96052, b=8.44992, c=2.93710<br>$\alpha,\beta,\gamma=90.00$ | Tc   | 4c           | 0.500000 | 0.359965 | 0.250000 |
|                   |                      |         |                                                                | B    | 4c           | 0.500000 | 0.062865 | 0.250000 |

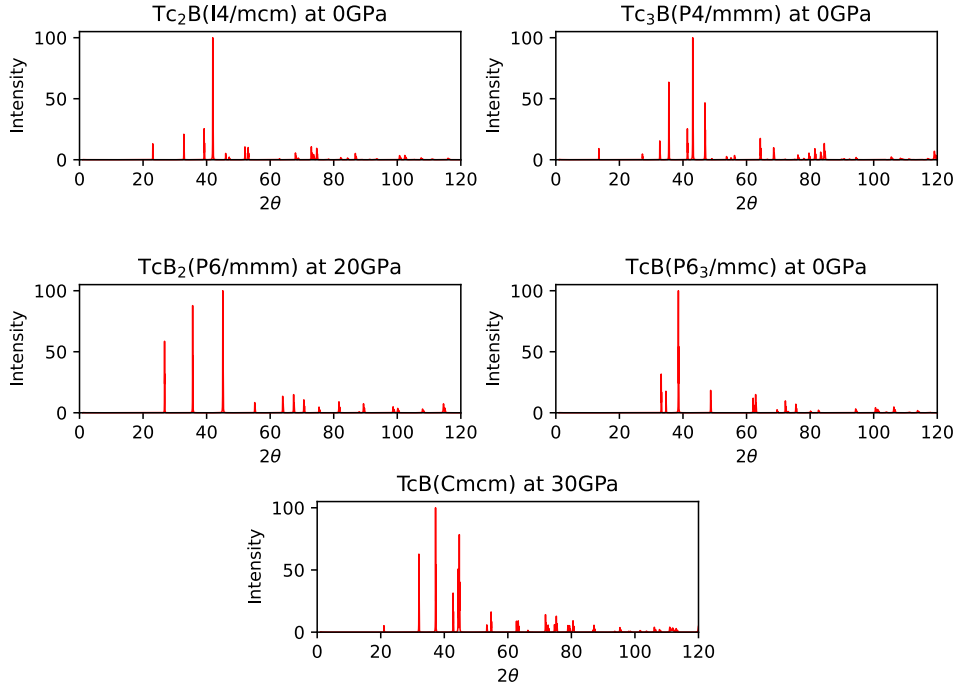

FIG. 3: The X-ray diffraction pattern of superconducting technetium-borides at their minimum dynamically stable pressures.

TABLE IV: Crystal structure information of thermodynamically stable technetium-borides on the convex hull at minimum pressures of their stable presence.

| Formula                        | Space Group          | P(GPa)                                                           | Lattice                                                                 | Atom     | Wyckoff Site | x        | y        | z        |
|--------------------------------|----------------------|------------------------------------------------------------------|-------------------------------------------------------------------------|----------|--------------|----------|----------|----------|
| Tc <sub>3</sub> B              | Cmcm                 | 0                                                                | a=2.91275, b=9.23801, c=7.23020<br>$\alpha, \beta, \gamma=90.00$        | Tc       | 8f           | 0.000000 | 0.134864 | 0.061586 |
|                                |                      |                                                                  |                                                                         | Tc       | 4c           | 0.000000 | 0.424640 | 0.250000 |
|                                |                      |                                                                  |                                                                         | B        | 4c           | 0.000000 | 0.256035 | 0.750000 |
| Tc <sub>7</sub> B <sub>3</sub> | P6 <sub>3</sub> mc   | 0                                                                | a=7.49018, b=7.49018, c=4.84714<br>$\alpha, \beta=90.00, \gamma=120.00$ | Tc       | 6c           | 0.091444 | 0.545722 | 0.548556 |
|                                |                      |                                                                  |                                                                         | Tc       | 6c           | 0.123690 | 0.247380 | 0.254361 |
|                                |                      |                                                                  |                                                                         | Tc       | 2b           | 0.333333 | 0.666667 | 0.083239 |
| B                              | 6c                   | 0.189486                                                         | 0.378972                                                                | 0.840006 |              |          |          |          |
| Tc <sub>2</sub> B              | C2/m                 | 30                                                               | a=9.08524, b=2.82434, c=6.18676<br>$\gamma, \alpha=90.00, \beta=127.14$ | Tc       | 4i           | 0.088603 | 0.500000 | 0.371883 |
|                                |                      |                                                                  |                                                                         | Tc       | 4i           | 0.664062 | 0.500000 | 0.082952 |
|                                |                      |                                                                  |                                                                         | B        | 4i           | 0.114749 | 0.000000 | 0.669473 |
| Tc <sub>2</sub> B              | Fddd                 | 70                                                               | a=4.27497, b=7.44655, c=14.70511<br>$\alpha, \beta, \gamma=90.00$       | Tc       | 16g          | 0.500000 | 0.000000 | 0.917324 |
|                                |                      |                                                                  |                                                                         | Tc       | 16f          | 0.000000 | 0.168933 | 0.000000 |
|                                |                      |                                                                  |                                                                         | B        | 16g          | 0.500000 | 0.000000 | 0.624551 |
| TcB                            | P2 <sub>1</sub>      | 30                                                               | a=4.29808, b=5.86289, c=5.81790<br>$\gamma, \alpha=90.00, \beta=90.03$  | Tc       | 2a           | 0.132513 | 0.809631 | 0.259501 |
|                                |                      |                                                                  |                                                                         | Tc       | 2a           | 0.137240 | 0.826455 | 0.739666 |
|                                |                      |                                                                  |                                                                         | Tc       | 2a           | 0.361956 | 0.176998 | 0.016808 |
|                                |                      |                                                                  |                                                                         | Tc       | 2a           | 0.365246 | 0.176744 | 0.481445 |
|                                |                      |                                                                  |                                                                         | B        | 2a           | 0.140431 | 0.529324 | 0.997154 |
|                                |                      |                                                                  |                                                                         | B        | 2a           | 0.148684 | 0.525550 | 0.503919 |
|                                |                      |                                                                  |                                                                         | B        | 2a           | 0.354157 | 0.458645 | 0.751918 |
|                                | B                    | 2a                                                               | 0.366385                                                                | 0.475243 | 0.248344     |          |          |          |
|                                | Pmn2 <sub>1</sub>    | 70                                                               | a=5.63663, b=4.20428, c=5.72358<br>$\alpha, \beta, \gamma=90.00$        | Tc       | 4b           | 0.237207 | 0.364271 | 0.676269 |
|                                |                      |                                                                  |                                                                         | Tc       | 2a           | 0.000000 | 0.132960 | 0.312490 |
| Tc                             |                      |                                                                  |                                                                         | 2a       | 0.000000     | 0.863248 | 0.824731 |          |
| B                              |                      |                                                                  |                                                                         | 4b       | 0.247299     | 0.856982 | 0.527743 |          |
| B                              |                      |                                                                  |                                                                         | 2a       | 0.000000     | 0.364130 | 0.973326 |          |
| B                              | 2a                   | 0.000000                                                         | 0.644823                                                                | 0.459989 |              |          |          |          |
| Pnma                           | 170                  | a=5.48366, b=2.67958, c=4.02962<br>$\alpha, \beta, \gamma=90.00$ | Tc                                                                      | 4c       | 0.177742     | 0.750000 | 0.386735 |          |
|                                |                      |                                                                  | B                                                                       | 4c       | 0.030572     | 0.750000 | 0.891267 |          |
| Tc <sub>3</sub> B <sub>4</sub> | C2/m                 | 160                                                              | a=7.29105, b=2.74764, c=5.39301<br>$\gamma, \alpha=90.00, \beta=112.93$ | Tc       | 4i           | 0.687754 | 0.500000 | 0.154769 |
|                                |                      |                                                                  |                                                                         | Tc       | 2c           | 0.000000 | 0.000000 | 0.500000 |
|                                |                      |                                                                  |                                                                         | B        | 4i           | 0.028510 | 0.500000 | 0.843043 |
|                                |                      |                                                                  |                                                                         | B        | 4i           | 0.190255 | 0.500000 | 0.433562 |
| TcB <sub>2</sub>               | P6 <sub>3</sub> /mmc | 0                                                                | a,b=2.89412, c=7.45850<br>$\alpha, \beta=90.00, \gamma=120.00$          | Tc       | 2d           | 0.333333 | 0.666667 | 0.750000 |
|                                |                      |                                                                  |                                                                         | B        | 4f           | 0.333333 | 0.666667 | 0.452349 |
| TcB <sub>2</sub>               | I4 <sub>1</sub> /amd | 180                                                              | a,b=2.77872, c=9.76920<br>$\alpha, \beta, \gamma=90.00$                 | Tc       | 4b           | 0.500000 | 0.500000 | 0.000000 |
|                                |                      |                                                                  |                                                                         | B        | 8e           | 0.000000 | 0.000000 | 0.085042 |
| TcB <sub>3</sub>               | P6 <sub>3</sub> /mmc | 10                                                               | a,b=2.87002, c=4.53652<br>$\alpha, \beta=90.00, \gamma=120.00$          | Tc       | 1f           | 0.666667 | 0.333333 | 0.500000 |
|                                |                      |                                                                  |                                                                         | B        | 2h           | 0.333333 | 0.666667 | 0.180736 |
|                                |                      |                                                                  |                                                                         | B        | 1e           | 0.666667 | 0.333333 | 0.000000 |
| TcB <sub>4</sub>               | P6 <sub>3</sub> /mmc | 40                                                               | a,b=2.79644, c=10.51697<br>$\alpha, \beta=90.00, \gamma=120.00$         | Tc       | 2d           | 0.333333 | 0.666667 | 0.750000 |
|                                |                      |                                                                  |                                                                         | B        | 4f           | 0.333333 | 0.666667 | 0.384967 |
|                                |                      |                                                                  |                                                                         | B        | 4f           | 0.333333 | 0.666667 | 0.958044 |

- [1] Y. Wang, J. Lv, L. Zhu, and Y. Ma, *Comput. Phys. Commun.* **183**, 2063 (2012), ISSN 0010-4655.  
[2] P. E. Blöchl, *Phys. Rev. B* **50**, 17953 (1994).  
[3] G. Kresse and D. Joubert, *Phys. Rev. B* **59**, 1758 (1999).  
[4] G. Kresse and J. Hafner, *Phys. Rev. B* **47**, 558 (1993).

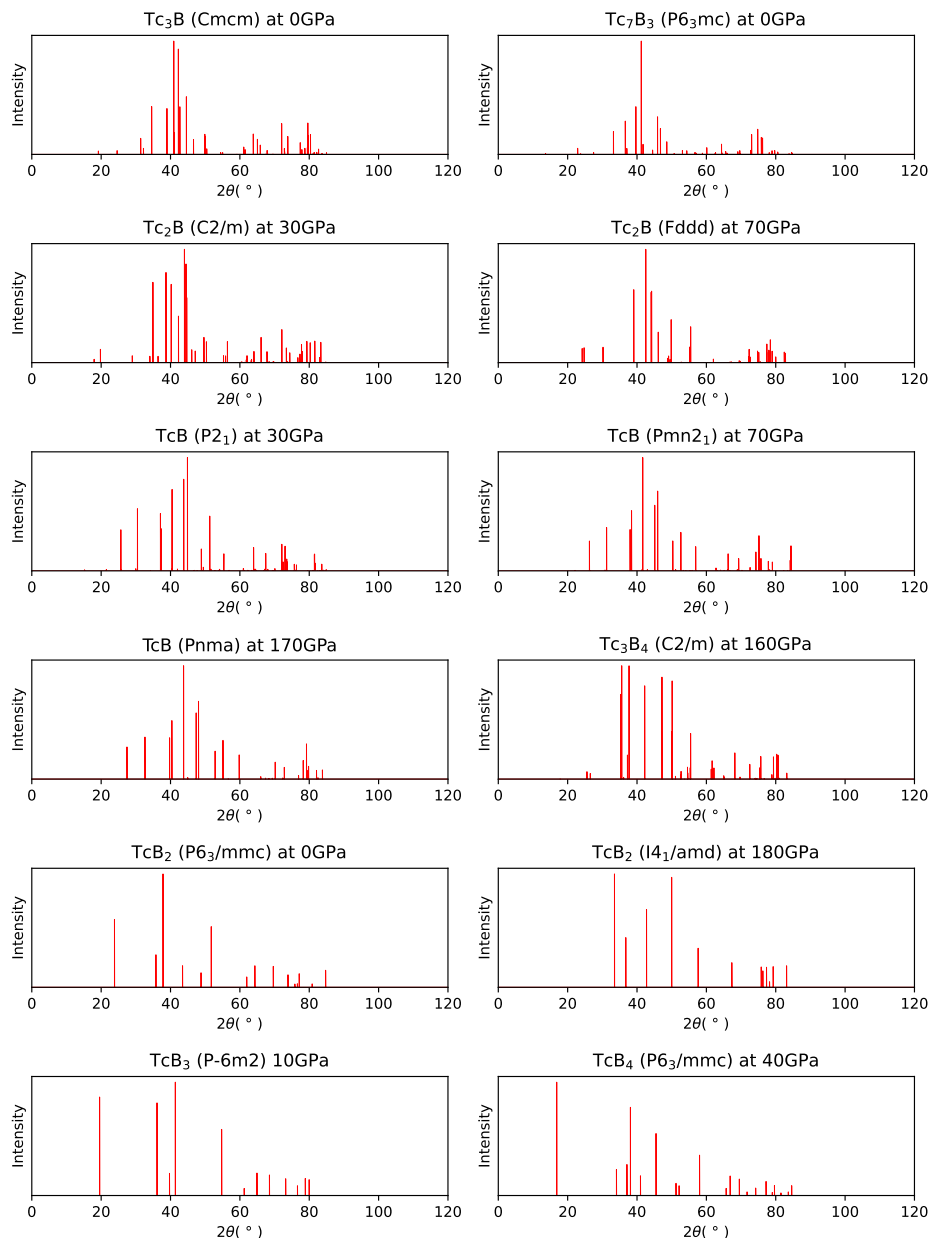

FIG. 4: The X-ray diffraction pattern of thermodynamically stable technetium-borides on the convex hull at the minimum pressures of their stable presence.

- [5] G. Kresse and J. Hafner, Phys. Rev. B **49**, 14251 (1994).
- [6] G. Kresse and J. Furthmüller, Phys. Rev. B **54**, 11169 (1996).
- [7] J. P. Perdew, K. Burke, and M. Ernzerhof, Phys. Rev. Lett. **77**, 3865 (1996), URL <https://link.aps.org/doi/10.1103/PhysRevLett.77.3865>.
- [8] P. Giannozzi, S. Baroni, N. Bonini, M. Calandra, R. Car, C. Cavazzoni, D. Ceresoli, G. L. Chiarotti, M. Cococcioni, and I. Dabo, J. Phys. Condens. Matter **21**, 395502 (2009), ISSN 0953-8984.
- [9] M. Methfessel and A. Paxton, Phys. Rev. B **40**, 3616 (1989).
- [10] S. Baroni, S. De Gironcoli, A. Dal Corso, and P. Giannozzi, Rev. Mod. Phys. **73**, 515 (2001).
- [11] P. B. Allen and R. C. Dynes, Phys. Rev. B **12**, 905 (1975), URL <https://link.aps.org/doi/10.1103/PhysRevB.12.905>.
- [12] P. Morel and P. W. Anderson, Phys. Rev. **125**, 1263 (1962), URL <https://link.aps.org/doi/10.1103/PhysRev.125.1263>.
- [13] F. Mouhat and F. Coudert, Phys. Rev. B **90**, 224104 (2014), URL <https://link.aps.org/doi/10.1103/PhysRevB.90.224104>.
